# Supplementary material for: Engineering metallic MoS2 monolayers with responsive hydrogen evolution electrocatalytic activities for enzymatic reaction monitoring
Source: Royal Society of Chemistry journal article supplement (doi:10.1039/d1ta01798e), 2021-01-01
Supplement: d1ta01798e1.pdf [file d1ta01798e1.pdf]

## Supporting Information

### **Engineering Metallic MoS<sub>2</sub> Monolayers with Responsive Hydrogen Evolution Electrocatalytic Activities for Enzymatic Reaction Monitoring**

*Bang Lin Li,\* Cheng-Bin Gong, Wei Shen, Jing-Dong Peng, Hao Lin Zou, Hong Qun Luo\* and Nian Bing Li\**

Laboratory of Luminescence Analysis and Molecular Sensing (Southwest University),  
Ministry of Education, School of Chemistry and Chemical Engineering, Southwest  
University, Chongqing 400715, P. R. China.

\*Correspondence and requests for materials should be addressed to B. L. Li ([chemlibl@swu.edu.cn](mailto:chemlibl@swu.edu.cn)), H. Q. Luo ([luohq@swu.edu.cn](mailto:luohq@swu.edu.cn)) and N. B. Li ([linb@swu.edu.cn](mailto:linb@swu.edu.cn)).

## **1. Experimental Procedures**

### ***1.1. Materials***

Molybdenum disulfide ( $\text{MoS}_2$  crystalline powder,  $< 2\ \mu\text{m}$ , 99%) was obtained from Sigma-Aldrich Co. (USA). Glucose oxidase (GOD, BC grade) was purchased from Sangon Biotech (Shanghai) Co., Ltd. Sodium cholate (98%), glucose, disodium hydrogen phosphate, and sodium dihydrogen phosphate were obtained from Aladdin Chemistry Co. Ltd. (Shanghai, China). N-butyllithium (n-BuLi, 2.5 mol/L) was obtained from Adamas Reagent, Ltd (Shanghai, China). Other chemicals were of analytical reagent grade and used without further purification. Ultrapure water ( $18.2\ \text{M}\Omega/\text{cm}$ ) was utilized throughout the whole experiment. The carbon paper substrates were purchased from Toray Industries Co. (Japan).

### ***1.2. Experimental Instrumentations***

The apparatuses of Schlenk line for “one-pot” chemical exfoliation of  $\text{MoS}_2$  were purchased from Tansoole Co. Ltd. (Shanghai, China). A KQ-400B ultrasonic bath (400 W, Kunshan Ultrasonic Instruments Co., Ltd., China) was adopted for the liquid-phase exfoliation of  $\text{MoS}_2$  crystals. The absorption spectra were recorded on a UV-2450 UV-vis spectrophotometer (Shimadzu, Japan). The defects and crystal lattices characterizations were conducted using a Tecnai G2 T20 UTWIN (FEI, USA) transmission electron microscope (TEM). The morphologies of  $\text{MoS}_2$  before and after the exfoliation were observed from the Regulus 8100 (Hitachi, Japan) scanning electron microscope (SEM). The thicknesses of layered  $\text{MoS}_2$  were measured by atomic force microscope (AFM, Multi-Mode, Bruker). X-ray photoelectron spectra (XPS) results were analyzed using an ESCALAB 250Xi X-ray photoelectron spectroscope (Thermo Electron, USA). Electrochemical measurements were conducted on the CH660E electrochemical workstation (Chenhua, China). Inductively coupled plasma-mass spectra (ICP-MS) were employed for the quantitative analysis of Mo species concentrations (Agilent 7800ce, USA).

### ***1.3. Liquid-Exfoliation of MoS<sub>2</sub>***

Briefly, a portion of 100.0 mL mixed aqueous dispersion, containing 5.0 mg/mL MoS<sub>2</sub> powders and 1.5 mg/mL sodium cholate, was treated with sonication (25°C, 20 h). The resultant dispersion was centrifuged (4000 rpm, 30 min) and yellow-green supernatant was collected to remove un-exfoliated bulk crystals and larger-size nanosheets.<sup>S1-S4</sup> Subsequently, the separated supernatant was centrifuged at 10000 rpm for further 30 min, and the sediments of MoS<sub>2</sub> samples were isolated, respectively. Finally, the collected sediments were re-dispersed into ultrapure water for the preparation of stocking solution of liquid-phase exfoliated MoS<sub>2</sub> (LE-MoS<sub>2</sub>) dispersion.

### ***1.4. Characterization of Exfoliated MoS<sub>2</sub>***

The high-resolution transmission microscope was employed for the defects and phase identification of SL-MoS<sub>2</sub> nanosheets. A portion of 10  $\mu$ L purified samples was dropped on an ultrathin carbon film covered Cu mesh, which was subsequently treated with an infrared baking lamp for drying. In terms of AFM and SEM records, SL-MoS<sub>2</sub> aqueous dispersion was dropped on a mica substrate with a fresh surface and a clean and polishing silicon chip. After the incubation for 10 min in room temperature, the aqueous dispersion on the mica and silicon substrates was removed with the blowing of nitrogen gases in case the aggregation of nanosheets with naturally drying and the samples were tested with AFM and SEM without the further treatments, respectively. The XPS measurements were conducted with the samples of SL-MoS<sub>2</sub> and LE-MoS<sub>2</sub> on silicon substrates.

## 2. Supporting Tables and Figures

### 2.1. Table S1

**Table S1. Comparison of glucose electrochemical sensors based on a series of modified materials.**

| Materials                              | Techniques        | Enzyme | Detection range  | LOD          | Modified operation                 | Electrode Substrate     | Ref.  |
|----------------------------------------|-------------------|--------|------------------|--------------|------------------------------------|-------------------------|-------|
| PdCuPt nanocrystals                    | Chronoamperometry | None   | 1-10 mM          | 1.29 $\mu$ M | Drop-casting and drying            | Glassy carbon electrode | [S5]  |
| Poly aniline/carbon nanotubes          | Chronoamperometry | None   | 0.05-0.3 mM      | 1.3 $\mu$ M  | Layer-by-layer assemble            | Patterned Au substrate  | [S6]  |
| Nickel-niobium nanoglass               | Chronoamperometry | None   | 0.24-4 mM        | 0.1 $\mu$ M  | Electro-deposition                 | Glassy electrode        | [S7]  |
| PtNi NP-GO                             | Chronoamperometry | None   | 0.5-35 mM        | 0.01 mM      | Electro-deposition                 | Glassy carbon electrode | [S8]  |
| MoS <sub>2</sub> -Au@Pt nanohybrids    | Chronoamperometry | None   | 10-30000 $\mu$ M | 1.08 $\mu$ M | Drop-casting and drying            | Glassy carbon electrode | [S9]  |
| Pt nanoparticles /polyaniline hydrogel | Chronoamperometry | GOD    | 0.01 to 8 mM     | 0.7 $\mu$ M  | Polyreaction and electrodeposition | Platinum electrode      | [S10] |

|                                            |                                  |     |                    |                  |                         |                                |           |
|--------------------------------------------|----------------------------------|-----|--------------------|------------------|-------------------------|--------------------------------|-----------|
| Porous graphene aerogel                    | Chronoamperometry                | GOD | 1-18 mM            | 0.87 mM          | Self-assemble           | Indium tin oxide               | [S11]     |
| Graphene/platinum nanoparticles            | Chronoamperometry                | GOD | 0-31.7 mM          | 0.197 mM         | Rotated inkjet printing | Cylindrical flexible electrode | [S12]     |
| PDA/ZIF-8                                  | Chronoamperometry                | GOD | 1-12000 $\mu$ M    | 0.333 $\mu$ M    | Drop-casting and drying | Glassy carbon electrode        | [S13]     |
| NiFe <sub>2</sub> /carbon nanocomposites   | Chronoamperometry                | GOD | 48.6-12500 $\mu$ M | 2.7 $\mu$ M      | Drop-casting and drying | Glassy carbon electrode        | [S14]     |
| Pt@BSA nanocomposites                      | Differential pulse voltammograms | GOD | 0.05-12.05 mM      | 0.015 mM         | Self-assemble           | Au electrode                   | [S15]     |
| Prussian Blue                              | Chronoamperometry                | GOD | 2-10 mM            | 50 $\mu$ M       | Printing                | Screen-printed electrode       | [S16]     |
| Graphene oxide                             | Cyclic voltammograms             | GOD | 3-9 mM             | 0.319 mM<br>4 mM | Drop-casting and drying | Screen-printed electrode       | [S17]     |
| Metallic-phase MoS <sub>2</sub> nanosheets | Linear sweep voltammetry         | GOD | 0.2-100.0 mM       | 0.053 mM         | Drop-casting and drying | Carbon fiber                   | This work |

## 2.2. Table S2

**Table S2.** The developed strategy was compared with the blood glucose monitor for glucose measurements in samples of serum and urine, respectively.

| Samples <sup>a</sup> | GOD/SL-MoS <sub>2</sub> /CPs |       |             | Blood glucose monitor |       |             |
|----------------------|------------------------------|-------|-------------|-----------------------|-------|-------------|
|                      | Measured                     | Added | Total       | Measured              | Added | Total       |
|                      | (mM)                         | (mM)  | (mM)        | (mM)                  | (mM)  | (mM)        |
| Serum 1              | 5.4 ± 0.32                   | 3.0   | 6.9 ± 0.22  | 5.2 ± 0.11            | 3.0   | 7.8 ± 0.41  |
| Serum 2              | 4.3 ± 0.24                   | 6.0   | 10.1 ± 0.31 | 4.1 ± 0.25            | 6.0   | 10.3 ± 0.36 |
| Serum 3              | 5.1 ± 0.27                   | 9.0   | 13.8 ± 0.15 | 4.8 ± 0.32            | 9.0   | 11.2 ± 0.28 |
| Urine 1              | -                            | 3.0   | 3.2 ± 0.14  | -                     | 3.0   | 2.7 ± 0.15  |
| Urine 2              | -                            | 6.0   | 5.4 ± 0.28  | -                     | 6.0   | 5.1 ± 0.33  |
| Urine 3              | -                            | 9.0   | 8.8 ± 0.43  | -                     | 9.0   | 7.3 ± 0.27  |

<sup>a</sup> n=5

## 2.3. Figure S1

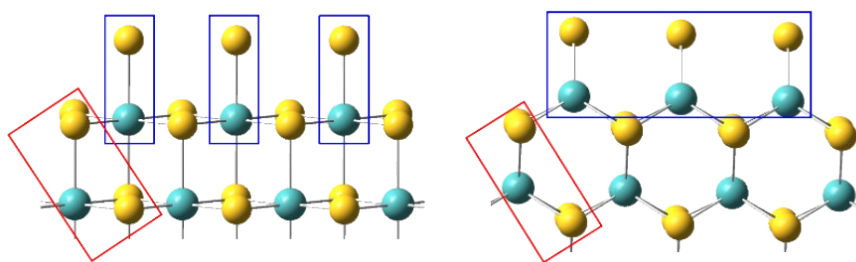

**Figure S1.** The initial geometry of 1T  $\text{Mo}_7\text{S}_{17}$  (Left) and 2H  $\text{Mo}_7\text{S}_{17}$  (Right). Blue balls are Mo atoms, and yellow balls are S atoms.

#### 2.4. Figure S2

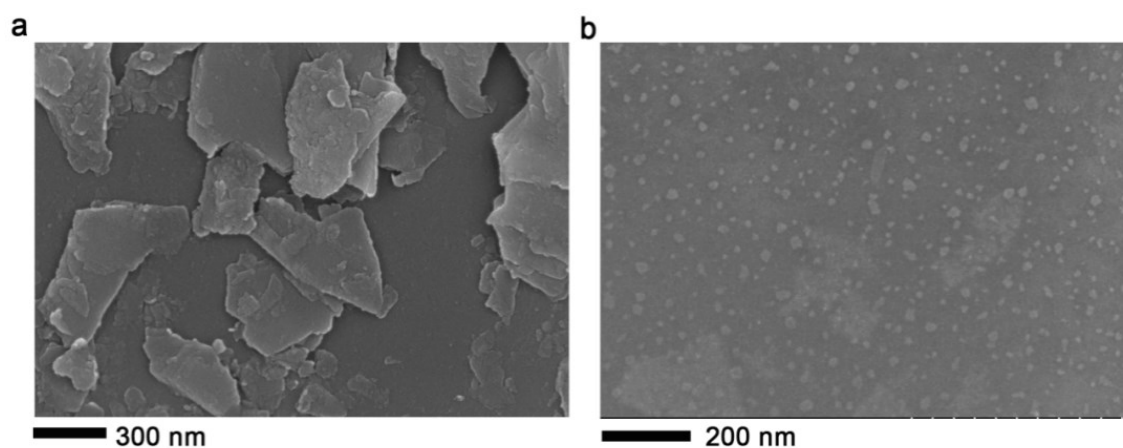

**Figure S2.** SEM images of bulk  $\text{MoS}_2$  crystals before (a) and after (b) the exfoliation treatment of the SL approach. As the lack of conductivity, the sample exhibited in panel (a) was treated with gold sputtering before SEM characterizations, whereas the sample in panel (b) was directly tested without gold sputtering.

#### 2.5. Figure S3

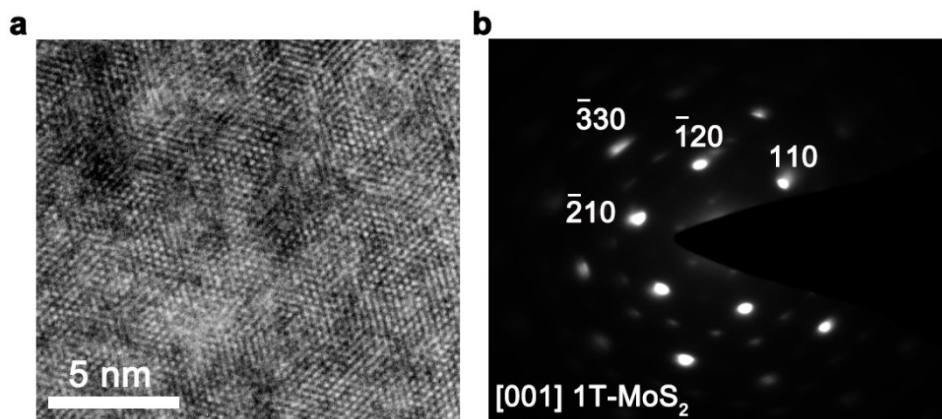

**Figure S3.** The HRTEM (a) and selected area electron diffraction (b) images of SL-MoS<sub>2</sub> indicating the metallic phase.

## 2.6. Figure S4

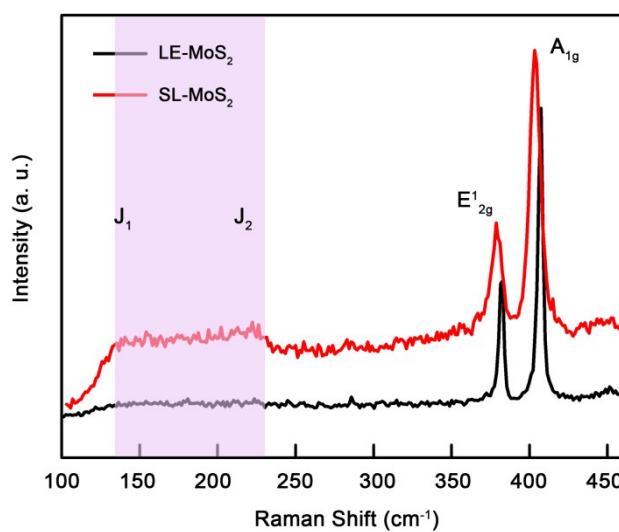

**Figure S4.** Raman spectra of SL-MoS<sub>2</sub> along with LE-MoS<sub>2</sub> as a comparison. The spectra are taken with an excitation wavelength of 633 nm. All spectra contain the expected MoS<sub>2</sub> transitions: E<sub>2g</sub><sup>1</sup> and A<sub>1g</sub>. The SL-MoS<sub>2</sub> has the characteristic metallic peaks (J<sub>1</sub> and J<sub>2</sub> modes).



## 2.7. Figure S5

The conductivities of SL-MoS<sub>2</sub> and LE-MoS<sub>2</sub> were exploited, identifying the phase characteristics. After the modification, the electrochemical impedance spectroscopy (EIS) results of SL-MoS<sub>2</sub> and LE-MoS<sub>2</sub> were recorded in comparison to the pure electrode (Fig. S5). It was found that the SL-MoS<sub>2</sub> modified carbon paper (SL-MoS<sub>2</sub>/CP) exhibited lower electrochemical impedance than both pure CP and LE-MoS<sub>2</sub>/CP. The high conductivity of SL-MoS<sub>2</sub>/CP promoted it to be the desired electrochemical catalyst in hydrogen evolution reaction.

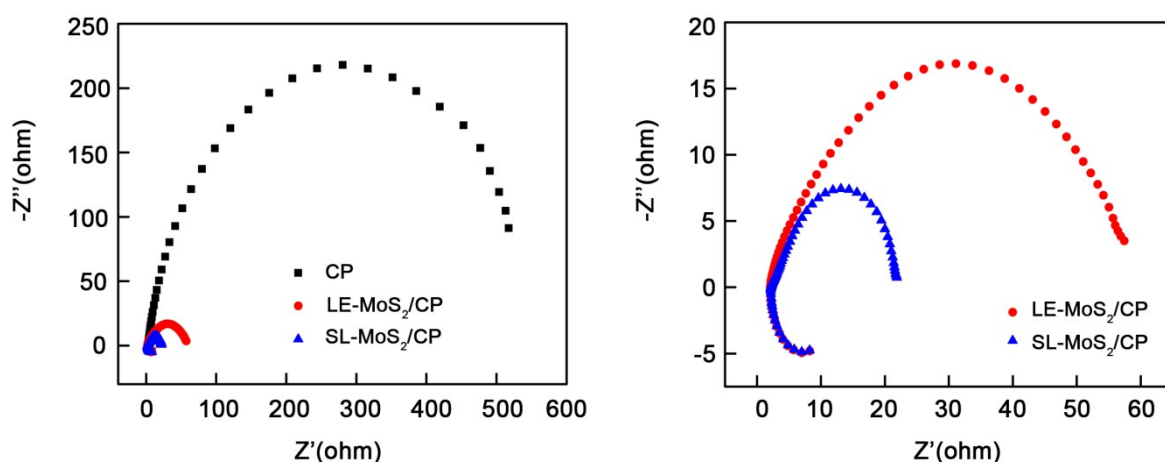

**Figure S5.** EIS results of pure CP, LE-MoS<sub>2</sub>/CP, and SL-MoS<sub>2</sub>/CP. The applied potential is -0.5 V.

## 2.8. Figure S6

The stability of HER performance of SL-MoS<sub>2</sub> was tested in comparison to that of LE-MoS<sub>2</sub> (Fig. S6). It was found that the even SL-MoS<sub>2</sub> exhibited superior electrocatalytic HER activities, the performance dropped when the testing time increased.<sup>[S18]</sup> Nevertheless, in contrast to SL-MoS<sub>2</sub>, LE-MoS<sub>2</sub> performed an increasing catalytic activity when the testing time increased at a range of 0 to 1 h, which subsequently trended to be stable.

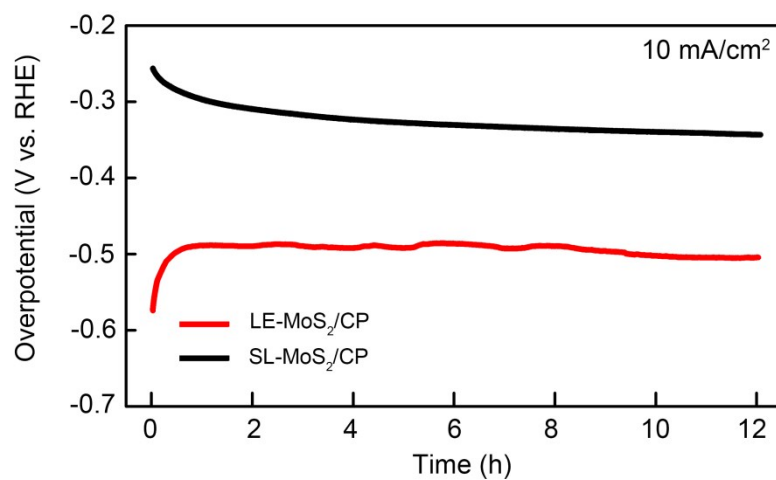

**Figure S6.** Over-potential tests of the LE-MoS<sub>2</sub>/CP and SL-MoS<sub>2</sub>/CP are measured as a function of time to maintain a current density of 10 mA/cm<sup>2</sup>.

## 2.9. Figure S7

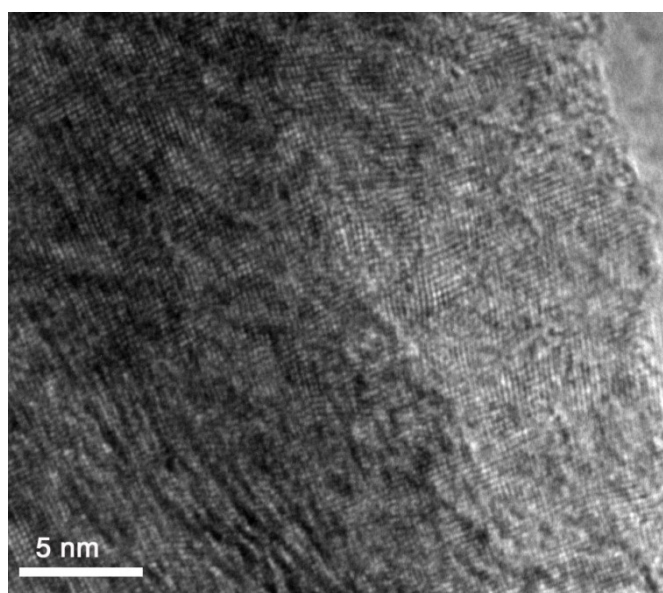

**Figure S7.** The TEM images of SL-MoS<sub>2</sub> samples collected from the SL-MoS<sub>2</sub>/CPs after the HER stability testing.

## 2.10. Figure S8

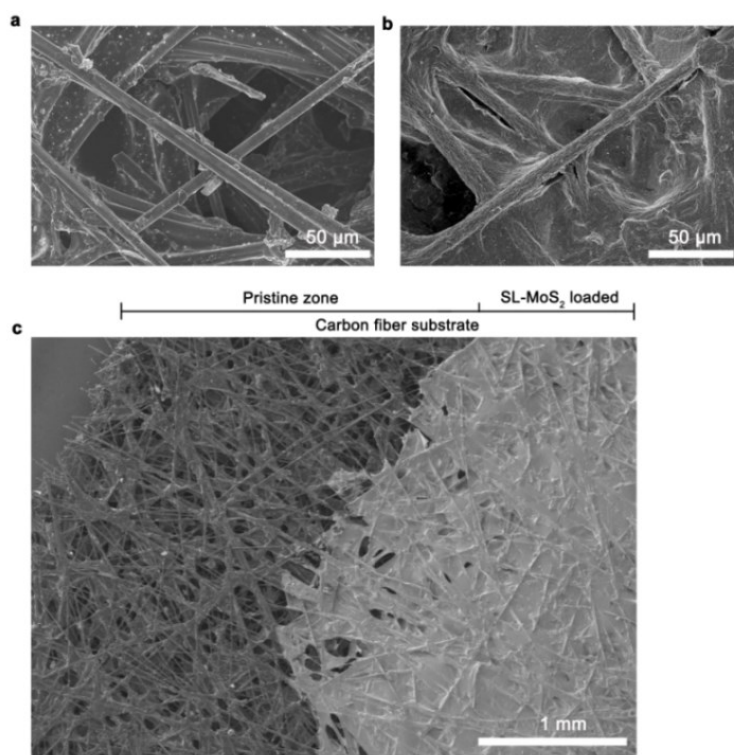

**Figure S8.** SEM images of the pristine CP consisting of carbon fibers (a) and SL-MoS<sub>2</sub> modified CPs (b and c). The samples were directly tested without gold sputtering.

### 2.11. Figure S9

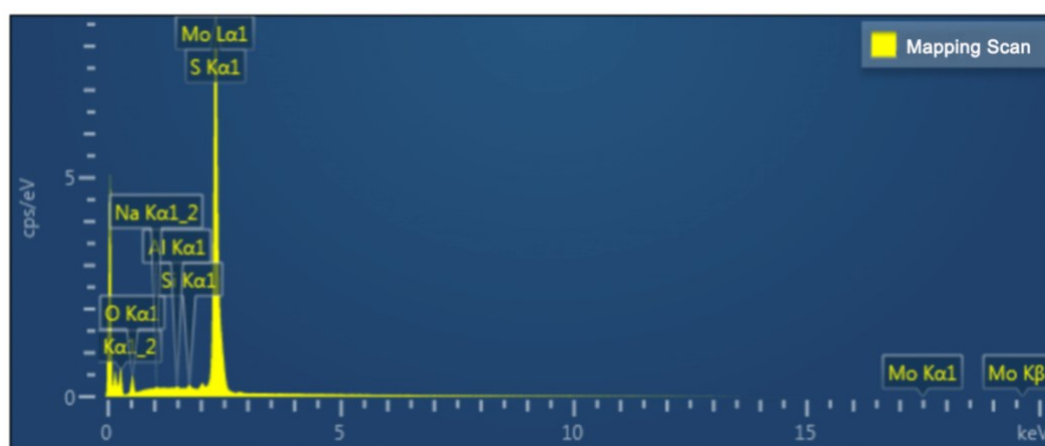

**Figure S9.** The EDS mapping scan result of the SL-MoS<sub>2</sub> modified carbon fibers.

## 3. Supporting References

- [S1] B. L. Li, H. L. Zou, L. Lu, Y. Yang, J. L. Lei, H. Q. Luo and N. B. Li, *Adv. Funct. Mater.*, 2015, **25**, 3541-3550.
- [S2] B. L. Li, M. I. Setyawati, L. Chen, J. Xie, K. Ariga, C. T. Lim, S. Garaj and D. T. Leong, *ACS Appl. Mater. Interfaces*, 2017, **9**, 15286-15296.
- [S3] B. L. Li, L. Y. Peng, H. L. Zou, L. J. Li, H. Q. Luo and N. B. Li, *Small*, 2018, **14**, 1703560.
- [S4] B. L. Li, H. L. Zou, J. K. Tian, G. Chen, X. H. Wang, H. Duan, X. L. Li, Y. Shi, J. R. Chen, L. J. Li, J. L. Lei, H. Q. Luo and N. B. Li, *Nano Energy*, 2019, **60**, 689-700.
- [S5] S. Fu, C. Zhu, J. Song, M. Engelhard, H. Xia, D. Du and Y. Lin, *ACS Appl. Mater. Interfaces*, 2016, **8**, 22196-22200.
- [S6] S. Y. Oh, S. Y. Hong, Y. R. Jeong, J. Yun, H. Park, S. W. Jin, G. Lee, J. H. Oh, H. Lee, S. S. Lee and J. S. Ha, *ACS Appl. Mater. Interfaces*, 2018, **10**, 13729-13740.
- [S7] S. Bag, A. Baksi, S. H. Nandam, D. Wang, X. Ye, J. Ghosh, T. Pradeep and H. Hahn, *ACS Nano*, 2020, **14**, 5543-5552.
- [S8] H. Gao, F. Xiao, C. B. Chin and H. Duan, *ACS Appl. Mater. Interfaces*, 2011, **3**, 3049-3057.
- [S9] S. Su, Z. Lu, J. Li, Q. Hao, W. Liu, C. Zhu, X. Shen, J. Shi and L. Wang, *New J. Chem.*, 2018, **42**, 6750-6755.
- [S10] D. Zhai, B. Liu, Y. Shi, L. Pan, Y. Wang, W. Li, R. Zhang and G. Yu, *ACS Nano*, 2013, **7**, 3540-3546.
- [S11] J. Xu, K. Xu, Y. Han, D. Wang, X. Li, T. Hu, H. Yi and Z. Ni, *Analyst*, 2020, **145**, 5141-5147.
- [S12] Z. Pu, J. Tu, R. Han, X. Zhang, J. Wu, C. Fang, H. Wu, X. Zhang, H. Yu and D. Li, *Lap Chip*, 2018, **18**, 3570-3577.
- [S13] Y. Wang, C. Hou, Y. Zhang, F. He, M. Liu and X. Li, *J. Mater. Chem. B*, 2016, **4**, 3695-3702.

- [S14] D. Xiang, L. Yin, J. Ma, E. Guo, Q. Li, Z. Li and K. Liu, *Analyst*, 2015, **140**, 644-653.
- [S15] C. Hu, D. P. Yang, F. Zhu, F. Jiang, S. Shen and J. Zhang, *ACS Appl. Mater. Interfaces*, 2014, **6**, 4170-4178.
- [S16] A. Martin, J. Kim, J. F. Kurniawan, J. R. Sempionatto, J. R. Moreto, G. Tang, A. S. Campbell, A. Shin, M. Y. Lee, X. Liu and J. Wang, *ACS Sens.*, 2017, **2**, 1860-1868.
- [S17] M. A. Akhtar, R. Batool, A. Hayat, D. Han, S. Riaz, S. U. Khan, M. Nasir, M. H. Nawaz and L. Niu, *ACS Appl. Nano Mater.*, 2019, **2**, 1589-1596.
- [S18] E. E. Benson, H. Zhang, S. A. Schuman, S. U. Nanayakkara, N. D. Bronstein, S. Ferrere, J. L. Blackburn, E. M. Miller, *J. Am. Chem. Soc.*, 2018, **140**, 441-450.
